# Supplementary material for: Generation of Primordial Germ Cell-like Cells from iPSCs Derived from Turner Syndrome Patients
Source: MDPI journal article supplement (doi:10.3390/cells10113099), 2021-11-10
Supplement: s1 [file s1]

# Generation of primordial germ cell-like cells from iPSCs derived from Turner syndrome patients

Aline Fernanda de Souza<sup>1,2\*</sup>; Fabiana Fernandes Bressan<sup>1</sup>; Naira Caroline Godoy Pieri<sup>1</sup>; Ramon Cesar Botigelli<sup>1,3</sup>; Tamas Revay<sup>4</sup>; Simone Kashima Haddadd<sup>5</sup>; Dimas Tadeu Covas<sup>5</sup>; Ester Silveira Ramos<sup>6</sup>; Willian Allan King<sup>2</sup>; Flavio Vieira Meirelles<sup>1</sup>

Supplementary Table, Figures and Legends

**Table S1.** Efficiency of expansion of PBMCs.

| Days of PBMCs expansion | Number of the Cells Live D0 | Number of the Cells Live D3 | Number of the Cells Live D6 | Number of the Cells Live D9 | Number of the Cells Live D10 |
|-------------------------|-----------------------------|-----------------------------|-----------------------------|-----------------------------|------------------------------|
| <b>Male Control</b>     | 9 × 10 <sup>6</sup>         | 3.6 × 10 <sup>6</sup>       | 1.17 × 10 <sup>6</sup>      | 1.41 × 10 <sup>6</sup>      | 1.64 × 10 <sup>6</sup>       |
| <b>Female Control</b>   | 3.2 × 10 <sup>7</sup>       | 9.6 × 10 <sup>5</sup>       | 1.8 × 10 <sup>6</sup>       | 2.7 × 10 <sup>6</sup>       | 4.2 × 10 <sup>6</sup>        |
| <b>Pt.1</b>             | 3.2 × 10 <sup>6</sup>       | 1.82 × 10 <sup>6</sup>      | 1.3 × 10 <sup>6</sup>       | 1.99 × 10 <sup>6</sup>      | 4.1 × 10 <sup>6</sup>        |
| <b>Pt.2</b>             | 8 × 10 <sup>6</sup>         | 5.2 × 10 <sup>6</sup>       | 3.53 × 10 <sup>6</sup>      | 5.1 × 10 <sup>6</sup>       | 3.8 × 10 <sup>6</sup>        |
| <b>Pt.3</b>             | 4.4 × 10 <sup>6</sup>       | 3.1 × 10 <sup>6</sup>       | 2.61 × 10 <sup>6</sup>      | 3.42 × 10 <sup>6</sup>      | 4.6 × 10 <sup>6</sup>        |
| <b>Pt.4</b>             | 3.4 × 10 <sup>6</sup>       | 2.18 × 10 <sup>6</sup>      | 4 × 10 <sup>5</sup>         | 1.34 × 10 <sup>6</sup>      | 1.53 × 10 <sup>6</sup>       |
| <b>Pt.5</b>             | 3.9 × 10 <sup>6</sup>       | 1.17 × 10 <sup>6</sup>      | 6 × 10 <sup>5</sup>         | 9.9 × 10 <sup>5</sup>       | 1.2 × 10 <sup>6</sup>        |

PBMCs= peripheral mononuclear blood cells; Pt= Patient; D=day.

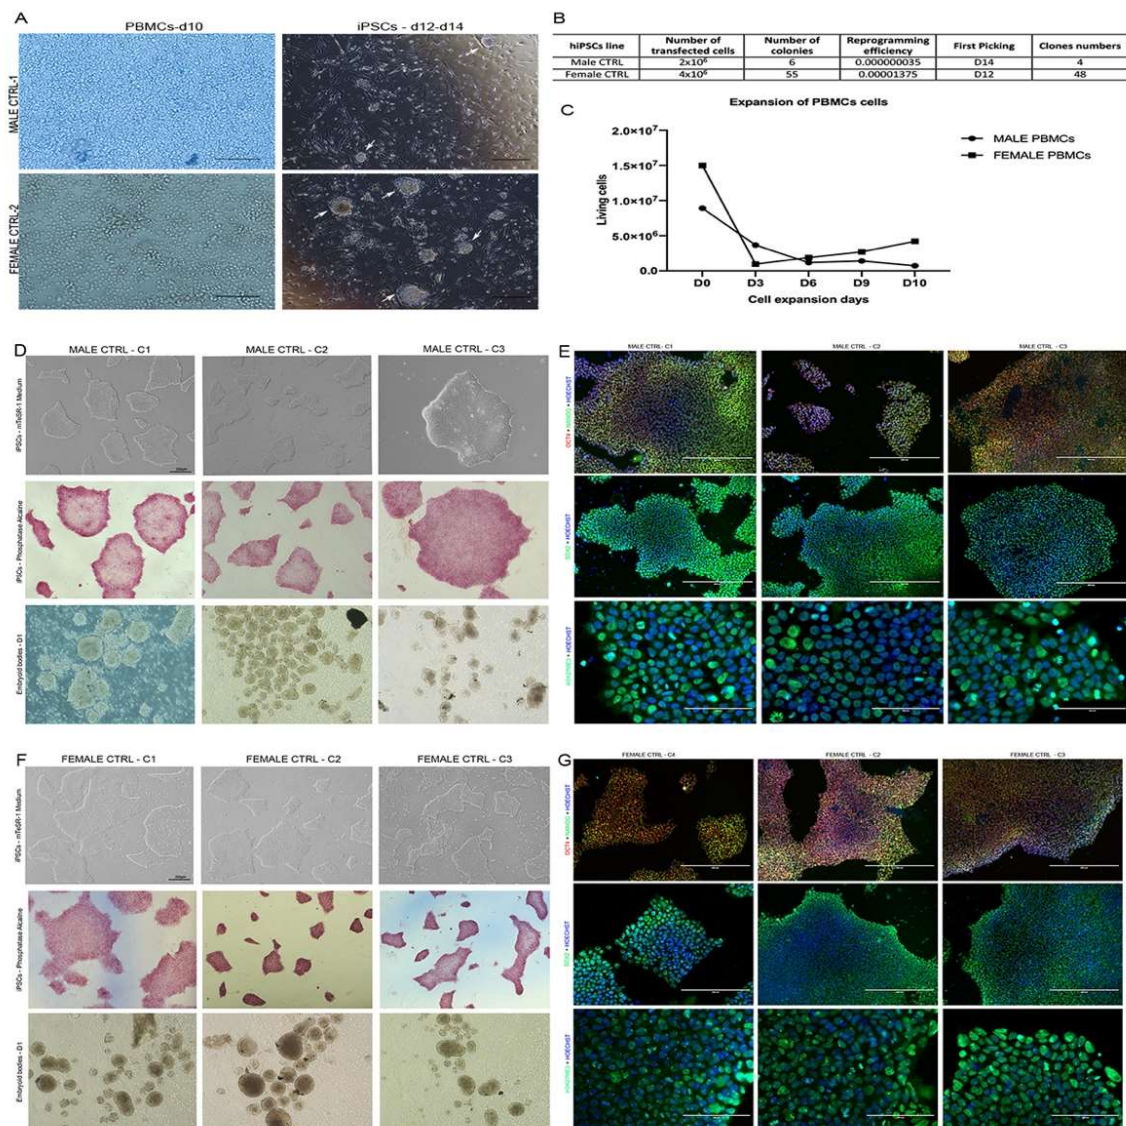

**Supplementary Figure S1.** Represent the process of reprogramming of PBMCs- CTRLs into hiPSCs and characterization of hiPSCs male and female controls. A. PBMCs with ten days of expansion in a specific medium for enrichment erythroblastic populations; the emergence of the first hiPSCs colonies maintained in hESCs medium on MEF, showed after 12 days. B. Table of efficiency of reprogramming of PBMCs by episomal vectors. (C) Graphic of representative cell growth data showing number of the live cells during expansion in a culture for nonlymphoid cell enrichment. The data was compiled from at least three independent experiments. D, E, F and G. Characterization of hiPSCs controls. D and F. Phase contrast image showed hiPSCs maintained in mTeSR-1 medium on Geltrex; positively stain of alkaline phosphatase; embryoid body formation after 24 hours of differentiation. Scale bars 200 $\mu$ m. E and G. Immunofluorescence analyzed showing the expression of pluripotency markers OCT4, SOX2, NANOG in hiPSCs controls (p20) and ESCs-H1 (p30). Nuclei were stained with Hoechst (blue). Scale bars: 200 $\mu$ m and 100 $\mu$ m. The data was compiled from at least three technical replicates.

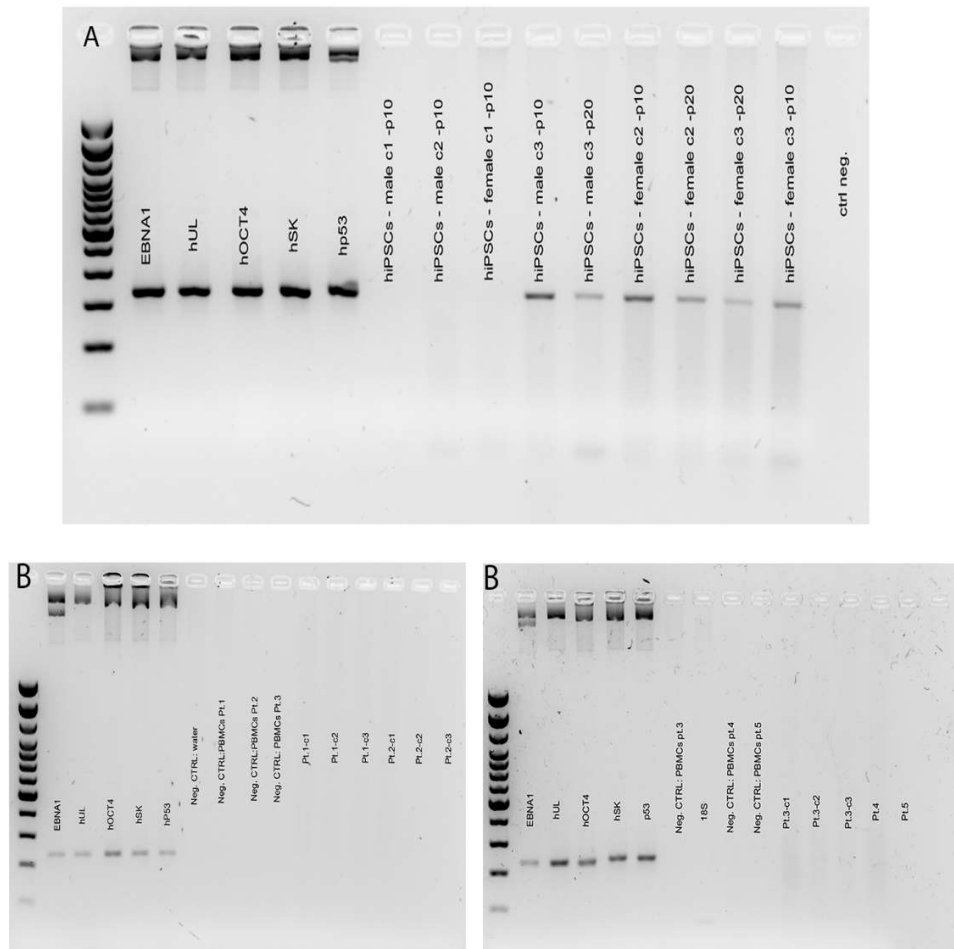

**Supplementary Figure S2.** Screening for occurrences of vector spontaneous integrations. A. Image of 1.5% agarose gel stained with ethidium bromide representative of the electrophoresis of the episomal vectors amplification reaction in hiPSC controls lines and colonies generated showing free integration of the vectors at hiPSCs male control colonies C1 and C2, and hiPSCs female control colony C1. hiPSCs male control colony C3 and hiPSCs female control, colonies C2 and C3 showed the presence of episomal vectors at p10 and p20. B. Image of 1.5% agarose gel stained with ethidium bromide representative of the electrophoresis of the episomal vectors amplification reaction in hiPSCs-TS lines and colonies generated showing free integration of the vectors. Data was compiled from at least three technical replicates.

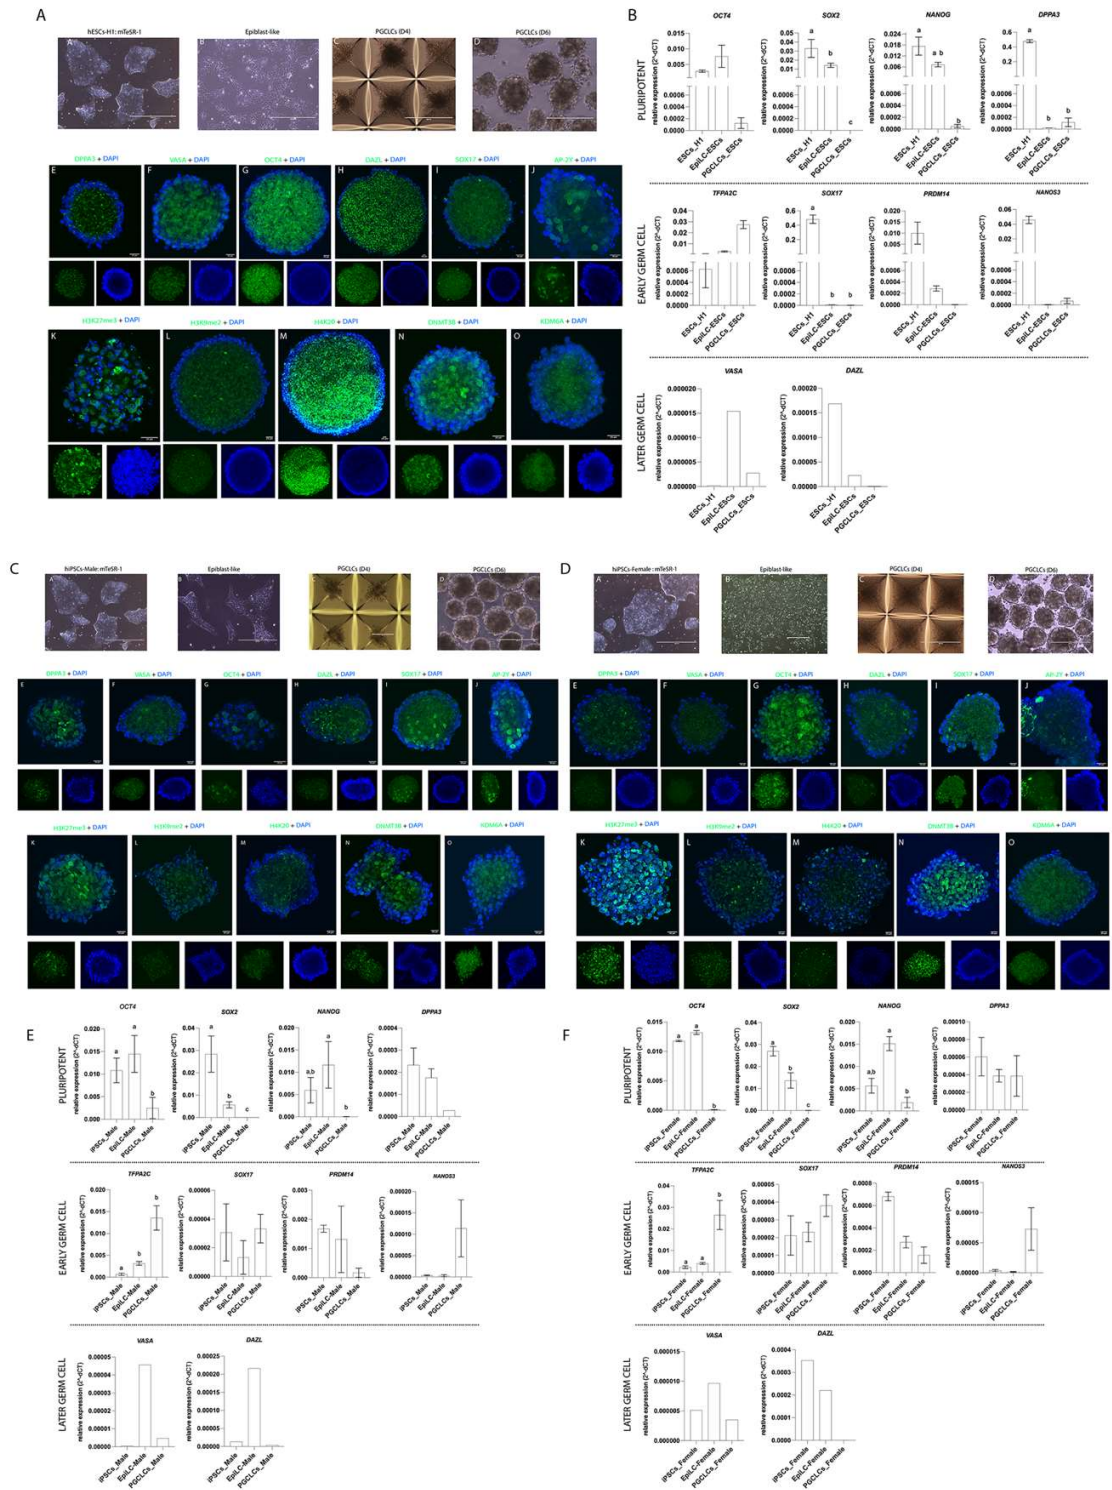

**Supplementary Figure S3.** Dynamics of pluripotent and germ cells markers during PGCLCs controls induction. A, C and D. ESCs-H1 (p30), hiPSCs male and female controls (p20) showed phase contrast image cells maintained in mTeSR-1 medium on geltrex; (b) ESCs-H1, hiPSCs male and female controls stimulated via hEpiLCs; (c) PGCLCs controls (D4) cultured in agree

well plated. Scale bars: 200µm; (d) PGCLCs controls (D6) isolated for further characterization. Scale bars: 400µm. (e, f, g, h, I and j) Immunofluorescence analyzed showing the expression of pluripotency and germ cells markers DDPA3, VASA, OCT4, DAZL, SOX17 AND AP-2γ. Nuclei were stained with Hoechst (blue). Scale bars s: 20µm. (k, l, m, n and o) Immunofluorescence analyzed showing the epigenetic profile of histones H3K27me3, H3K9me2 and H4K20; and DNMT3B and KDM6A protein markers. Nuclei were stained with Hoechst (blue). Scale bars: 20µm. The data was compiled from at least two technical replicates for all staining. B, E and F. ESCs-H1 (p30), hiPSCs male and female controls (p20), hEpiLCs controls (D2), and PGCLCs controls (D6) quantification of the relative expression of *OCT4*, *SOX2*, *NANOG*, *DPPA3*, *TFAP2C*, *SOX17*, *PRDM14*, *NANOS3*, *VASA* and *DAZL* genes associated with germ cells development. Individual reactions of qRT-PCR were normalized to the *B-ACTIN* gene. The data was compiled from at least three technical replicates for ESCs, hiPSCs, hEpiLCs and PGCLCs. P values were calculated by Two-way ANOVA, followed by Tukey's multiple comparisons test as appropriate. (letters a-b-c show difference between groups). Error bars denote represent SEM.

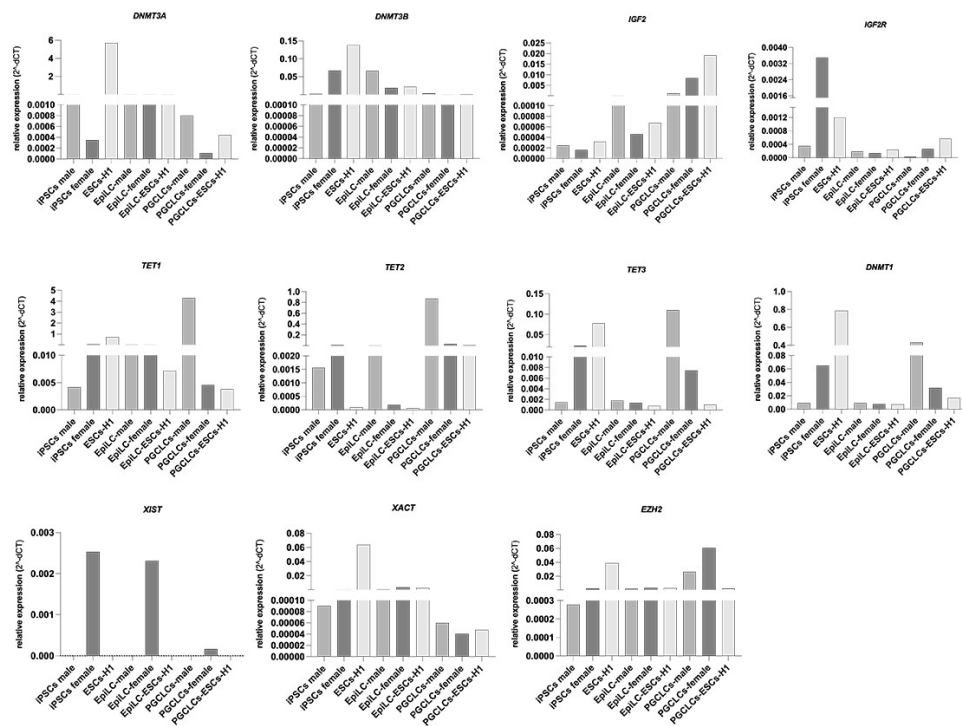

**Supplementary Figure.S4:** Epigenetic profile during PGCLCs controls induction. hiPSCs male and female controls (p20), ESCs-H1 (p30), hEpiLCs controls (D.2), and hPGCLCs controls (D.6) quantification of the relative expression of genes associated with epigenetic marks. Individual reactions of qRT-PCR were normalized to the *B-ACTIN* gene. The data was compiled from at least three technical replicates. Results are represent individually, and no statistical values were calculated.
